# Supplementary material
Source: HighWire-hosted journal article supplement (http://www.cmajopen.ca/highwire/filestream/81418/field_highwire_adjunct_files/0/2019-0009-1-at.pdf)

## Appendix 1 (as supplied by the authors): Stages of concept mapping

Our study reports on the first phase of concept mapping, idea generation, where we consulted with patients and caregivers across Ontario to understand what affects their experience in the transition from hospital to home. Final results of concept mapping will be used to inform what is prioritized in Health Quality Ontario's quality standard on the transition from hospital to home.

Figure adapted from William M.K. Trochim  
(<http://www.socialresearchmethods.net/kb/conmap.htm>)

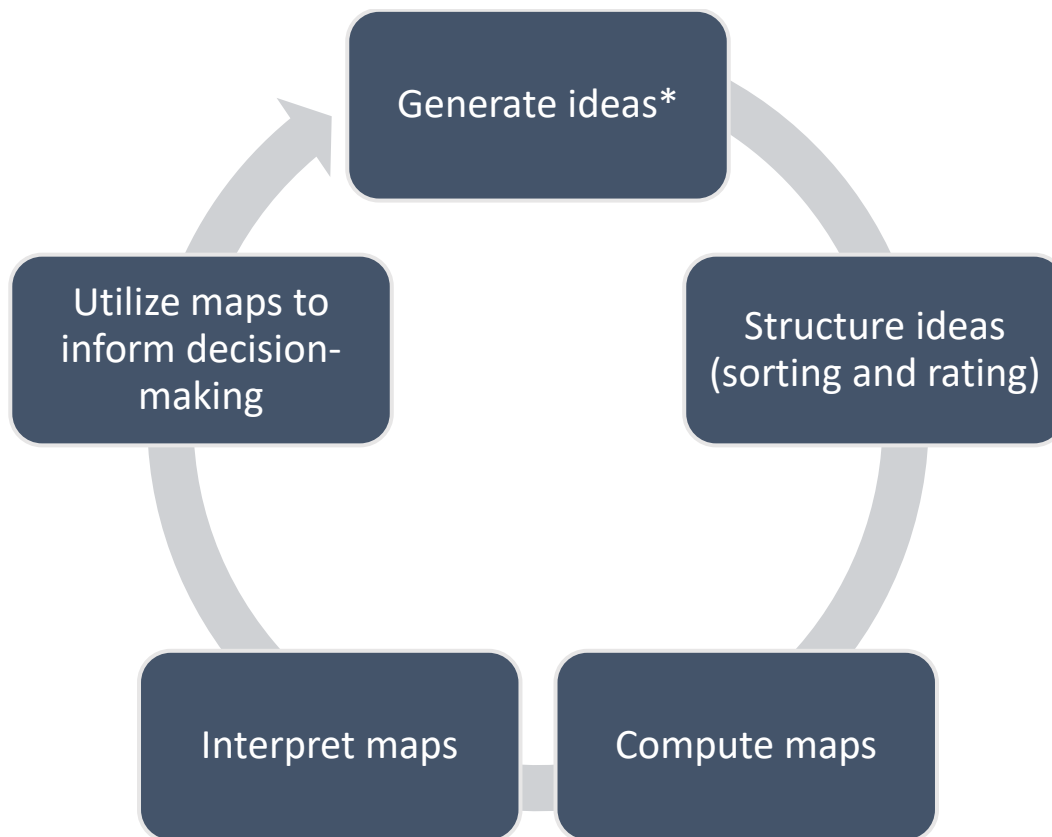

Supplement: 2019-0009-1-at.pdf [file 2019-0009-1-at.pdf]
